# Supplementary material for: Desulfurization of diesel via joint adsorption and extraction using a porous liquid derived from ZIF-8 and a phosphonium-type ionic liquid
Source: Royal Society of Chemistry journal article supplement (doi:10.1039/d3re00364g), 2023-01-01
Supplement: d3re00364g1.pdf [file d3re00364g1.pdf]

*Electronic supplementary information for*

**Desulfurization of diesel *via* joint adsorption and extraction using a porous liquid derived from ZIF-8 and a phosphonium-type ionic liquid**

Chenhua Shu,<sup>\*ab</sup> Min Zhao,<sup>a</sup> Hua Cheng,<sup>a</sup> Yajie Deng,<sup>a</sup> Pierre Stiernet,<sup>b</sup> Niklas Hedin<sup>b</sup>  
and Jiayin Yuan<sup>\*b</sup>

<sup>a</sup>*School of Chemistry and Environmental Science, Shangrao Normal University, Shangrao 334001, China*

<sup>b</sup>*Department of Materials and Environmental Chemistry, Stockholm University, Stockholm, 10691 Sweden*

\* Corresponding author.

E-mail address: [chenhua.shu@mmk.su.se](mailto:chenhua.shu@mmk.su.se); [jiayin.yuan@mmk.su.se](mailto:jiayin.yuan@mmk.su.se)

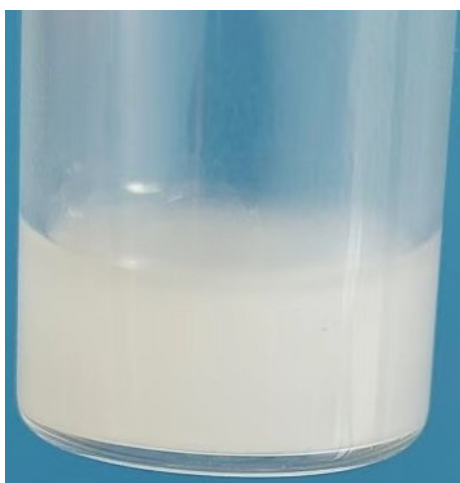

**Fig. S1.** The photograph of the porous liquid with 2 wt.% content of ZIF-8 in [THTDP][BTI].

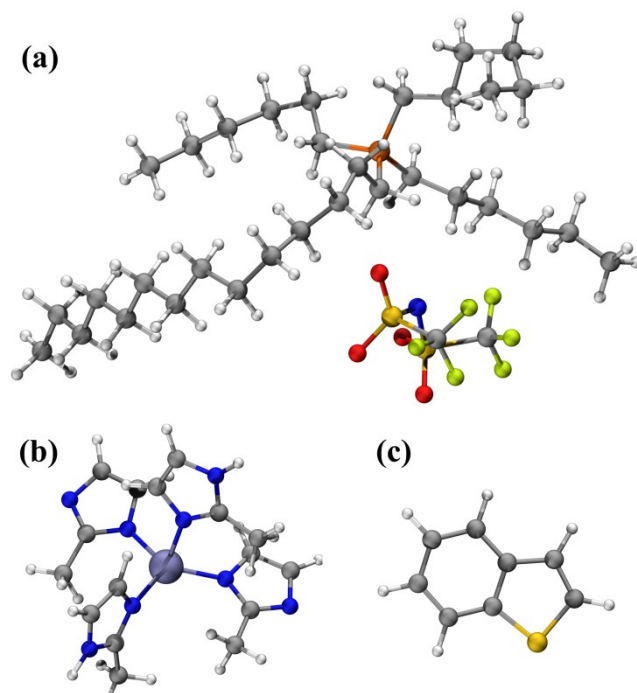

**Fig. S2.** Configurations of (a) [THTDP][BTI], (b) Zn(im)<sub>4</sub> and (c) BT. Carbon atoms are displayed in grey, hydrogen in grayish white, phosphorus in orange, nitrogen in blue, sulfur in yellow, oxygen in red, fluorine in green, and zinc in grey blue.

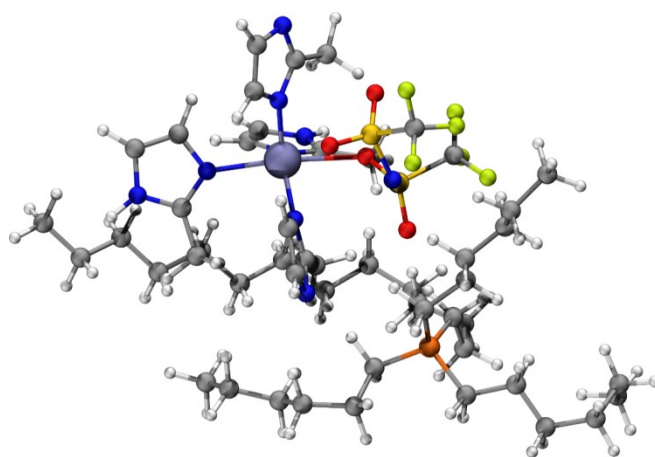

**Fig. S3.** Optimized configurations of ZIF-8/[THTDP][BTI].

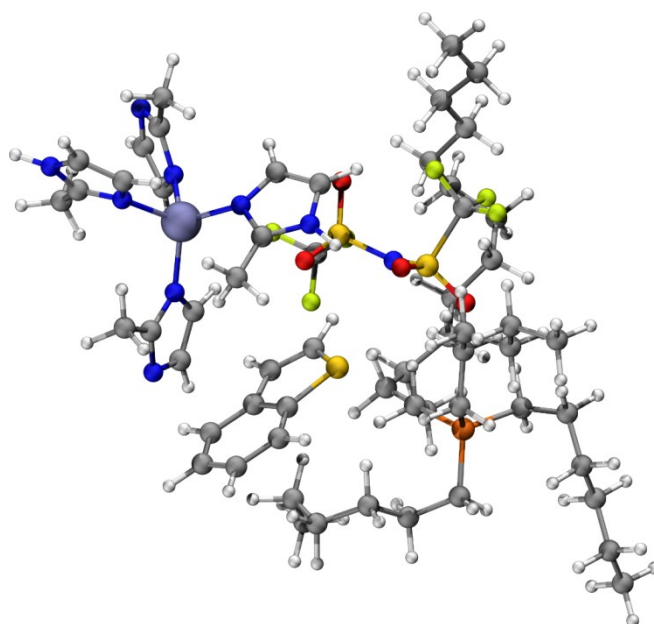

**Fig. S4.** Optimized configurations of ZIF-8/[THTDP][BTI]⋯BT.
